# Supplementary material
Source: MDPI journal article supplement (https://www.mdpi.com/2073-4395/12/9/2230)
Supplement: s1 [file s1]

## SUPPLEMENTARY MATERIAL

**Table S1.** Results of factorial analysis of variance (ANOVA) examining the effect of three N treatments and three cultivars on total yield and percentage discard fruit, in muskmelon and sweet pepper. Significant effects are shown as: ns,  $p>0.05$ ; \*,  $p<0.05$ ; \*\*,  $p<0.01$ ; \*\*\*,  $p<0.001$ .

| Year | Effect       | df | Muskmelon   |                 | Sweet pepper |                 |
|------|--------------|----|-------------|-----------------|--------------|-----------------|
|      |              |    | F-value     |                 | F-value      |                 |
|      |              |    | Total yield | % Discard fruit | Total yield  | % Discard fruit |
| 2020 | Block (B)    | 3  | 3.77*       | 2.80ns          | 0.59ns       | 54.54**         |
|      | Nitrogen (N) | 2  | 21.88*      | 21.38*          | 139.49***    | 10.16ns         |
|      | Cultivar (C) | 2  | 65.57*      | 6.44**          | 2.37ns       | 0.27ns          |
|      | N x C        | 4  | 0.85ns      | 1.26ns          | 4.84***      | 29.53***        |
|      | Error        | 24 |             |                 |              |                 |
| 2021 | Block (B)    | 3  | 0.63ns      | 3.85*           | 3.86*        | 5.89**          |
|      | Nitrogen (N) | 2  | 306.75***   | 31.84***        | 2.35ns       | 0.54ns          |
|      | Cultivar (C) | 2  | 10.95***    | 18.61***        | 2.40ns       | 7.79**          |
|      | N x C        | 4  | 1.69ns      | 7.22***         | 0.42ns       | 0.99ns          |
|      | Error        | 24 |             |                 |              |                 |

**Table S2.** Results of factorial analysis of variance (ANOVA) examining the effect of three N treatments and three cultivars on fruit firmness and TSS, in muskmelon and sweet pepper. Significant effects are shown as: ns,  $p>0.05$ ; \*,  $p<0.05$ ; \*\*,  $p<0.01$ ; \*\*\*,  $p<0.001$ .

| Year | Effect       | df | Muskmelon |          | Sweet pepper |          |
|------|--------------|----|-----------|----------|--------------|----------|
|      |              |    | F-value   |          | F-value      |          |
|      |              |    | Firmness  | TSS      | Firmness     | TSS      |
| 2020 | Block (B)    | 3  | 11.78***  | 4.11*    | 0.23ns       | 3.91*    |
|      | Nitrogen (N) | 2  | 0.77ns    | 11.79*** | 0.34ns       | 4.45*    |
|      | Cultivar (C) | 2  | 12.00***  | 58.58*** | 39.53***     | 47.58*** |
|      | N x C        | 4  | 1.23ns    | 0.67ns   | 0.17ns       | 1.00ns   |
|      | Error        | 24 |           |          |              |          |
| 2021 | Block (B)    | 3  | 1.90ns    | 0.84ns   | 2.74ns       | 1.62ns   |
|      | Nitrogen (N) | 2  | 5.30*     | 2.87ns   | 1.25ns       | 11.21*** |
|      | Cultivar (C) | 2  | 6.56**    | 24.32*** | 13.21***     | 39.58*** |
|      | N x C        | 4  | 0.21ns    | 0.56ns   | 0.90ns       | 0.63ns   |
|      | Error        | 24 |           |          |              |          |

**Table S3.** Results of factorial analysis of variance (ANOVA) examining the effect of three N treatments and three different cultivars on fruit weight and equatorial and polar fruit diameters, in muskmelon and sweet pepper. Significant effects are shown as: ns,  $p>0.05$ ; \*,  $p<0.05$ ; \*\*,  $p<0.01$ ; \*\*\*,  $p<0.001$ .

|      |              |    | <b>Muskmelon</b> |            |          | <b>Sweet pepper</b> |            |           |
|------|--------------|----|------------------|------------|----------|---------------------|------------|-----------|
|      |              |    | F-value          |            |          | F-value             |            |           |
|      |              |    | Fruit            | Equatorial | Polar    | Fruit               | Equatorial | Polar     |
| Year | Effect       | df | weight           | diameter   | diameter | weight              | diameter   | diameter  |
| 2020 | Block (B)    | 3  | 0.98ns           | 0.46ns     | 1.70ns   | 1.48ns              | 1.82ns     | 0.70ns    |
|      | Nitrogen (N) | 2  | 8.56**           | 8.44**     | 9.57**   | 1.37ns              | 0.40ns     | 3.16ns    |
|      | Cultivar (C) | 2  | 1.11ns           | 2.36ns     | 1.18ns   | 82.40***            | 9.58***    | 111.72*** |
|      | N x C        | 4  | 0.45ns           | 0.25ns     | 1.15ns   | 0.23ns              | 0.17ns     | 1.07ns    |
|      | Error        | 24 |                  |            |          |                     |            |           |
| 2021 | Block (B)    | 3  | 5.49**           | 4.15*      | 0.72ns   | 0.90ns              | 4.08*      | 2.11ns    |
|      | Nitrogen (N) | 2  | 1.70ns           | 21.34***   | 17.60*** | 0.50ns              | 2.59ns     | 0.72ns    |
|      | Cultivar (C) | 2  | 1.20ns           | 26.89***   | 1.13ns   | 135.50***           | 39.70***   | 554.89*** |
|      | N x C        | 4  | 3.52*            | 1.69ns     | 0.57ns   | 3.60*               | 1.20ns     | 0.70ns    |
|      | Error        | 24 |                  |            |          |                     |            |           |

**Table S4.** Results of factorial analysis of variance (ANOVA) testing the effect of three N treatments and three different cultivars on internal fruit colour in muskmelon and sweet pepper. Significance is shown as: ns,  $p>0.05$ ; \*,  $p<0.05$ ; \*\*,  $p<0.01$ ; \*\*\*,  $p<0.001$ .

| Year | Effect       | df | Muskmelon |           |           |           |          |           | Sweet pepper |          |          |        |          |          |
|------|--------------|----|-----------|-----------|-----------|-----------|----------|-----------|--------------|----------|----------|--------|----------|----------|
|      |              |    | F-value   |           |           |           |          |           | F-value      |          |          |        |          |          |
|      |              |    | L*        | a*        | b*        | h         | C*       | IC*       | L*           | a*       | b*       | h      | C*       | IC*      |
| 2020 | Block (B)    | 3  | 3.65*     | 1.80ns    | 4.01*     | 0.70ns    | 3.10*    | 1.45ns    | 0.80ns       | 0.65ns   | 0.79ns   | 0.46ns | 1.63ns   | 0.91ns   |
|      | Nitrogen (N) | 2  | 3.91*     | 0.26ns    | 12.82***  | 5.96**    | 9.12***  | 8.59**    | 14.92***     | 0.55ns   | 13.99*** | 5.40*  | 4.46*    | 12.22*** |
|      | Cultivar (C) | 2  | 11.77***  | 142.80*** | 123.70*** | 304.66*** | 79.87*** | 284.87*** | 6.44**       | 8.55**   | 5.24*    | 0.38ns | 10.50*** | 0.83ns   |
|      | N x C        | 4  | 2.16ns    | 2.49ns    | 1.94ns    | 0.93ns    | 1.64ns   | 1.30ns    | 0.36ns       | 7.26***  | 2.06ns   | 1.46ns | 6.27**   | 1.49ns   |
|      | Error        | 24 |           |           |           |           |          |           |              |          |          |        |          |          |
| 2021 | Block (B)    | 3  | 1.40ns    | 1.80ns    | 4.00*     | 0.30ns    | 3.86*    | 0.26ns    | 99.19***     | 3.58*    | 8.11***  | 0.11ns | 4.82**   | 11.05*** |
|      | Nitrogen (N) | 2  | 7.20**    | 4.19*     | 36.04***  | 23.90***  | 29.59*** | 27.37***  | 1.12ns       | 1.03ns   | 1.43ns   | 0.32ns | 1.14ns   | 0.21ns   |
|      | Cultivar (C) | 2  | 56.20***  | 410.82*** | 89.76***  | 930.50*** | 74.31*** | 750.04*** | 2.51ns       | 24.91*** | 11.54*** | 5.91** | 23.95*** | 1.37ns   |
|      | N x C        | 4  | 3.30*     | 9.56***   | 1.79ns    | 9.90***   | 2.47ns   | 10.77***  | 0.11ns       | 2.53ns   | 0.57ns   | 2.63ns | 1.96ns   | 1.60ns   |
|      | Error        | 24 |           |           |           |           |          |           |              |          |          |        |          |          |

**Figure S1**

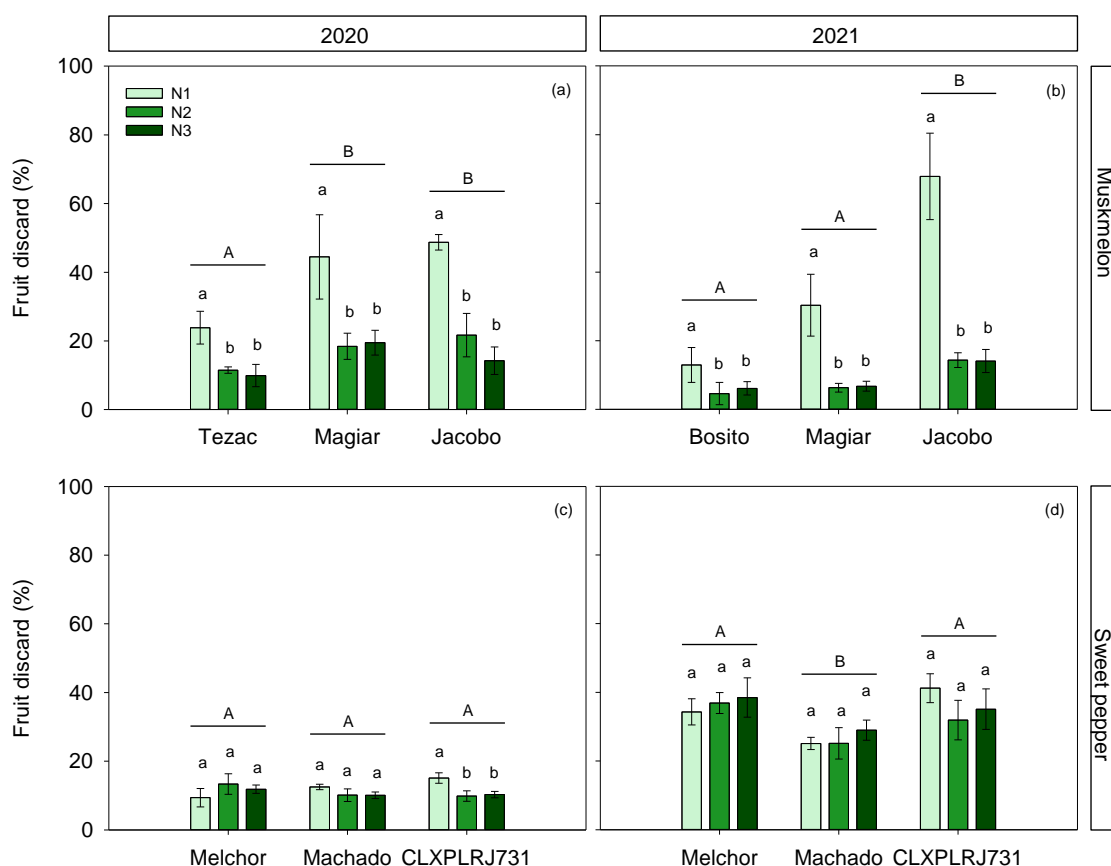

**Figure S1.** Percentage of fruit discard for three different cultivars and three N treatments, for muskmelon ((a) and b)) and sweet pepper ((c) and d)) crops, conducted in 2020 and 2021 years. Different lower-case letters show significant differences between N treatments within each cultivar; different upper-case letters show significant differences between cultivars. Values are means  $\pm$  SE.

**Figure S2**

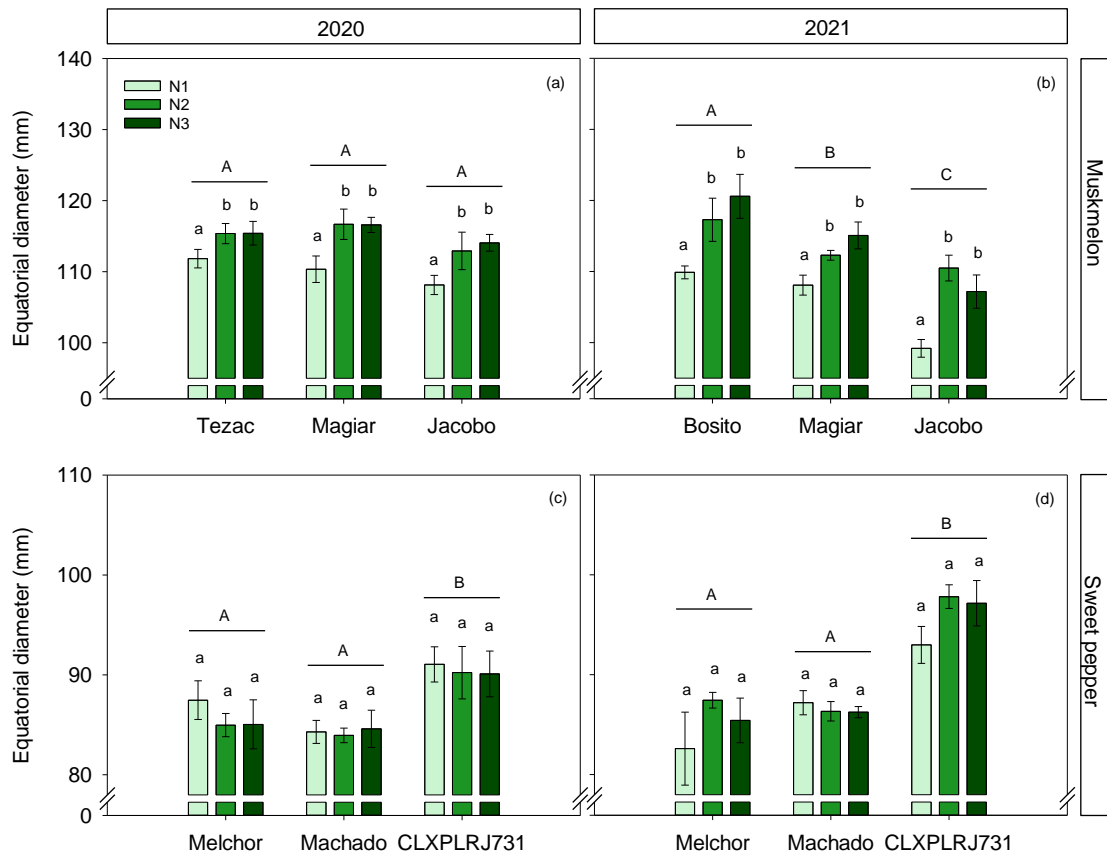

**Figure S2.** Fruit equatorial diameter for three different cultivars and three N treatments, for muskmelon ((a) and b)) and sweet pepper ((c) and d)) crops, conducted in 2020 and 2021 years. Different lower-case letters show significant differences between N treatments within each cultivar; different upper-case letters show significant differences between cultivars. Values are means  $\pm$  SE.

**Figure S3**

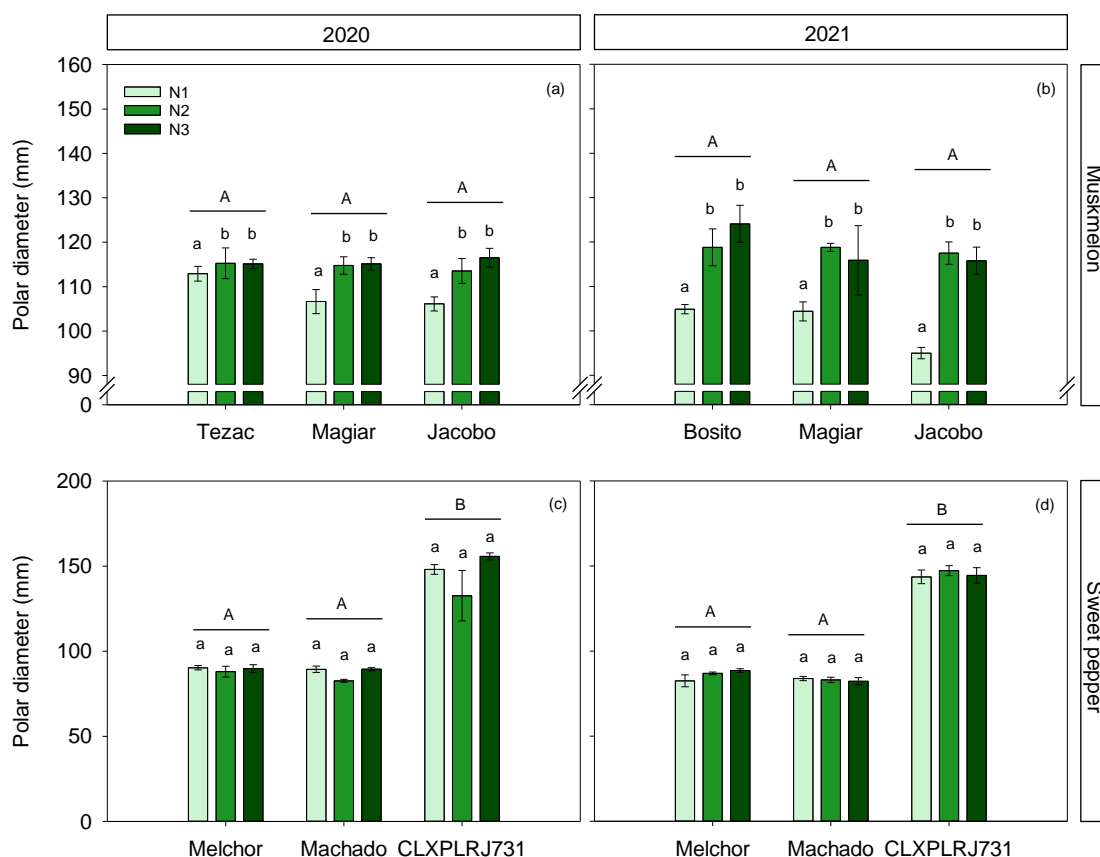

**Figure S3.** Fruit polar diameter for three different cultivars and three N treatments, for muskmelon ((a) and b)) and sweet pepper ((c) and d)) crops, conducted in 2020 and 2021 years. Different lower-case letters show significant differences between N treatments within each cultivar; different upper-case letters show significant differences between cultivars. Values are means  $\pm$  SE.

**Figure S4**

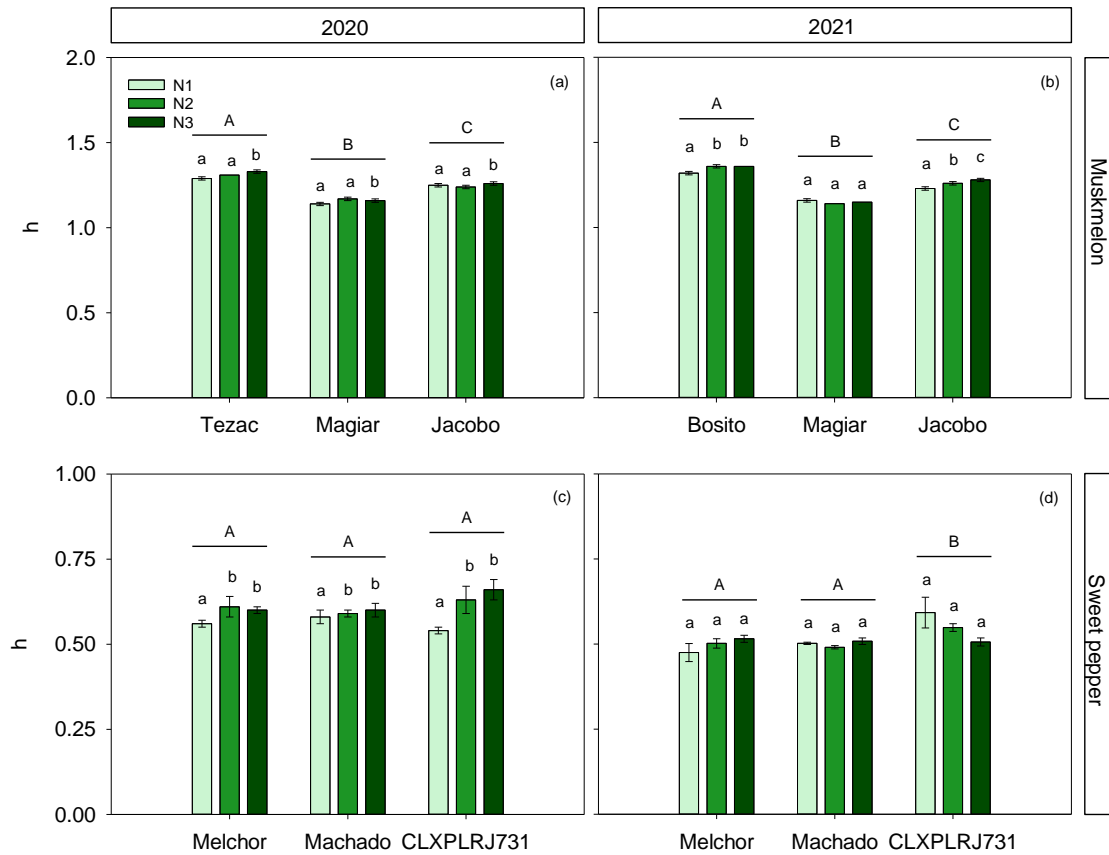

**Figure S4.** Fruit hue angle (h) for three cultivars and three N treatments, for muskmelon ((a) and b)) and sweet pepper ((c) and d)) crops, conducted in 2020 and 2021 years. Fruit measurements are internal for muskmelon and external for sweet pepper. Different lower-case letters show significant differences between N treatments within each cultivar; different upper-case letters show significant differences between cultivars. Values are means  $\pm$  SE.

**Figure S5**

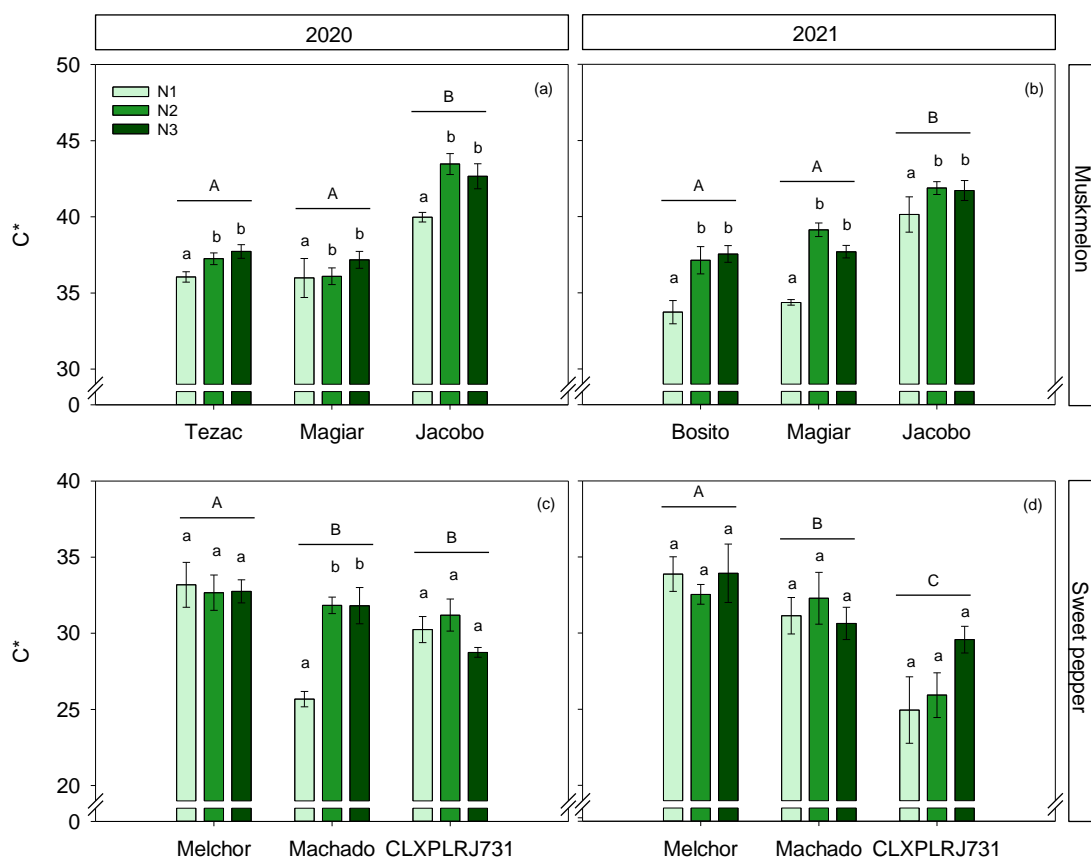

**Figure S5.** Fruit chroma ( $C^*$ ) for three cultivars and three N treatments, for muskmelon ((a) and b)) and sweet pepper ((c) and d)) crops, conducted in 2020 and 2021 years. Fruit measurements are internal for muskmelon and external for sweet pepper. Different lower-case letters show significant differences between N treatments within each cultivar; different upper-case letters show significant differences between cultivars. Values are means  $\pm$  SE.

**Figure S6**

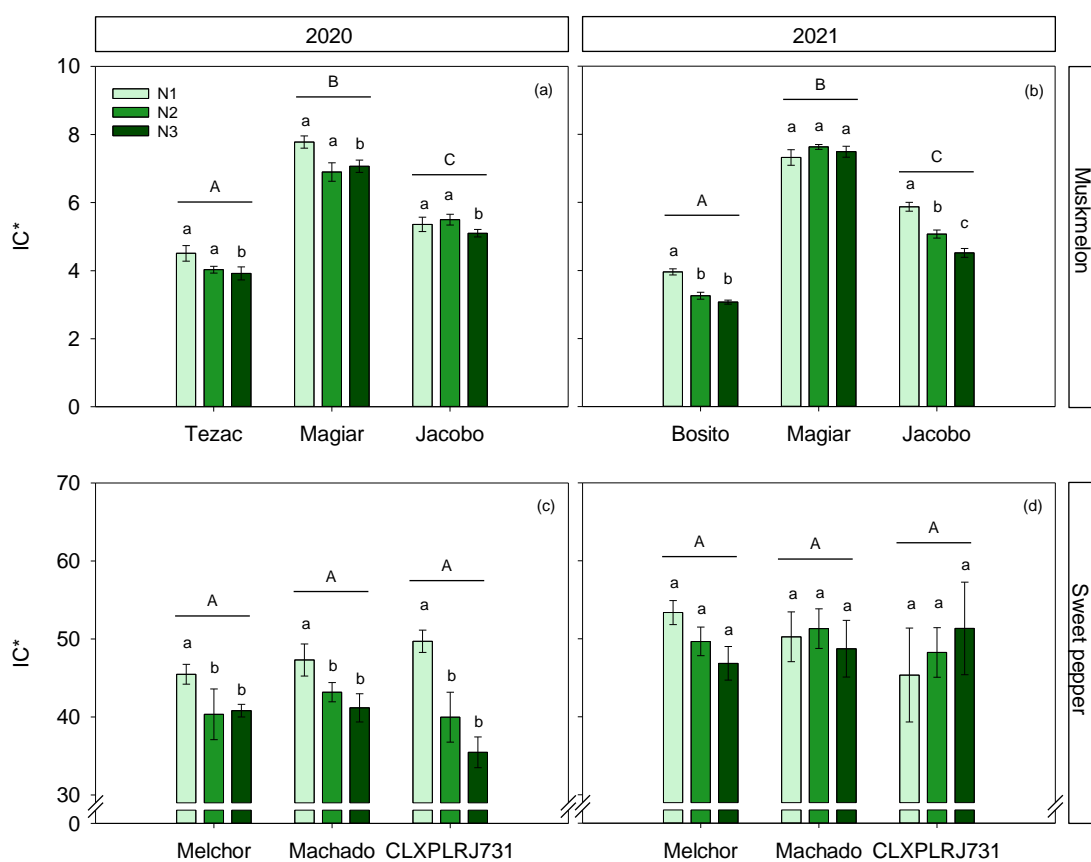

**Figure S6.** Fruit colour index (IC\*) for three cultivars and three N treatments, for muskmelon ((a) and b)) and sweet pepper ((c) and d)) crops, conducted in 2020 and 2021 years. Fruit measurements are internal for muskmelon and external for sweet pepper. Different lower-case letters show significant differences between N treatments within each cultivar; different upper-case letters show significant differences between cultivars. Values are means  $\pm$  SE.
